# Supplementary material
Source: publisher site journal article supplement (https://www.dovepress.com/article/367722)
Supplement: Supplementary file 1 [file 07_Jun_2022_Suplementary_Material_Combined.pdf › 07_Jun_2022_Suplementary_Material_Combined.pdf]

**Figure S1-1**

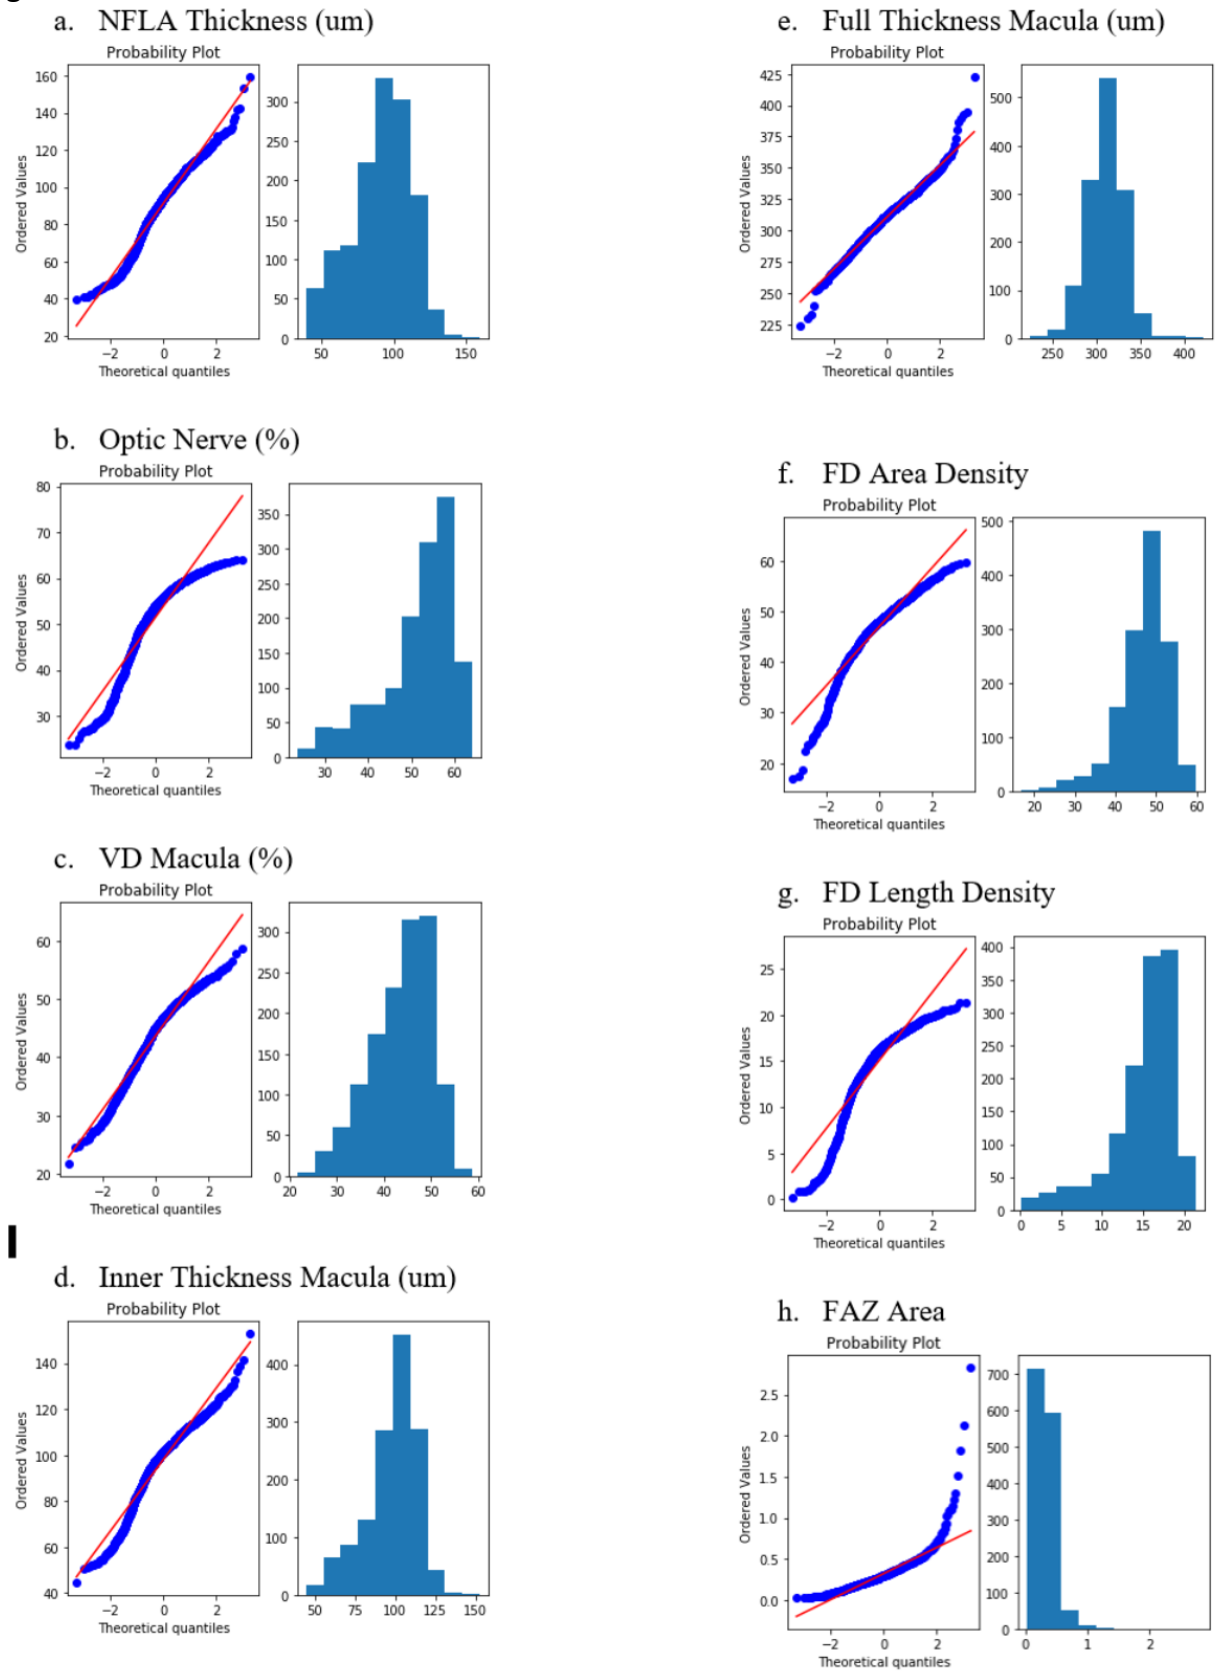

Figure S1-2

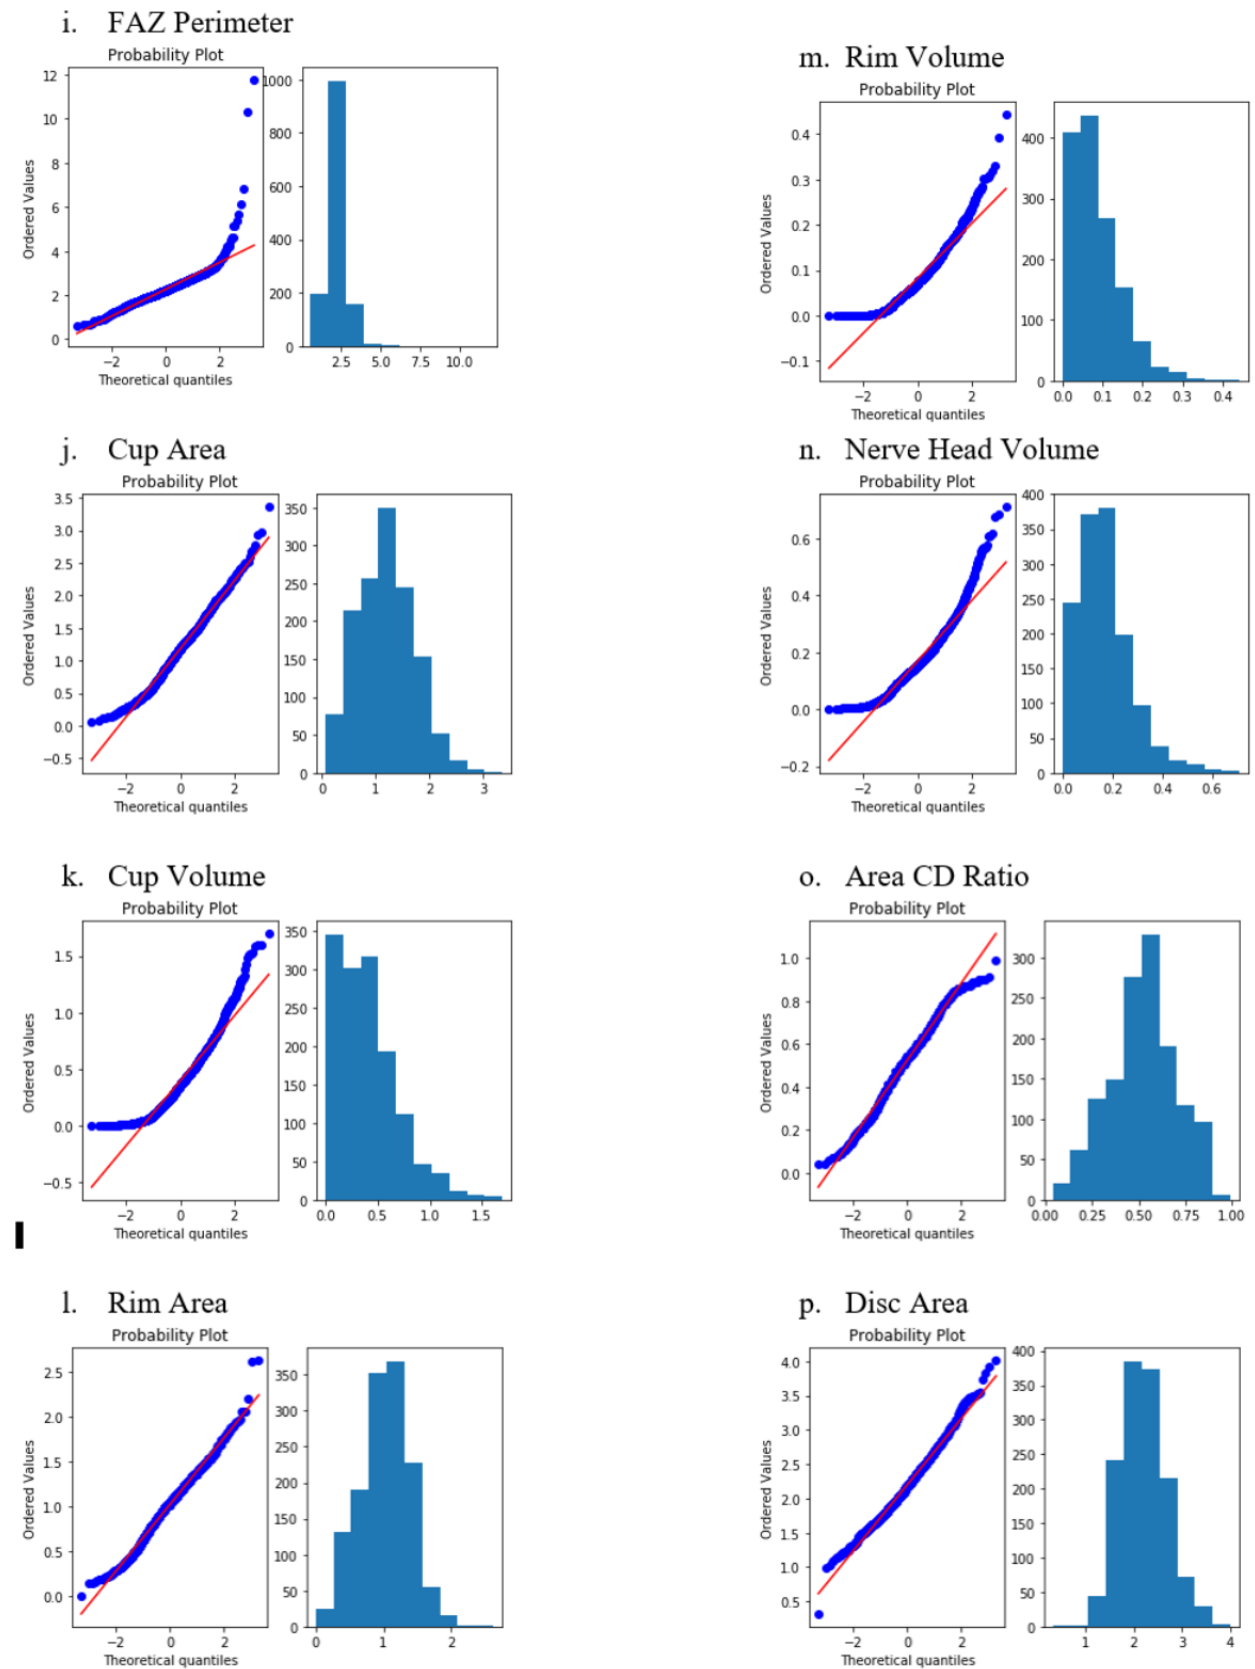

**Figure S1-3**

q. HCD Ratio

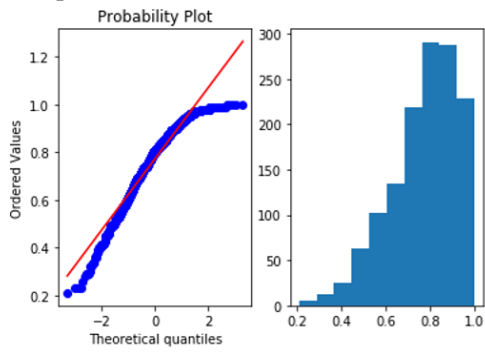

u. VD Inferior Hemisphere

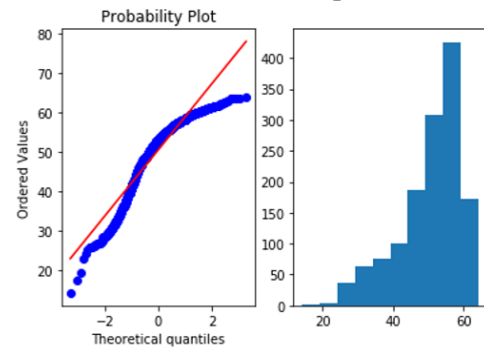

r. VCD Ratio

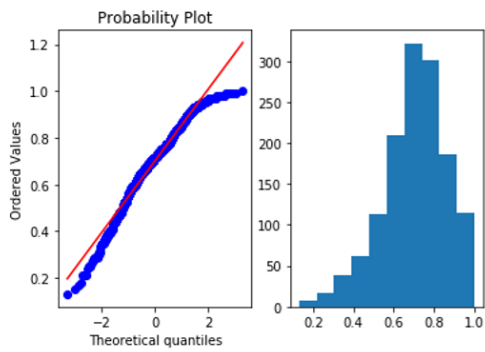

v. VD Whole Image

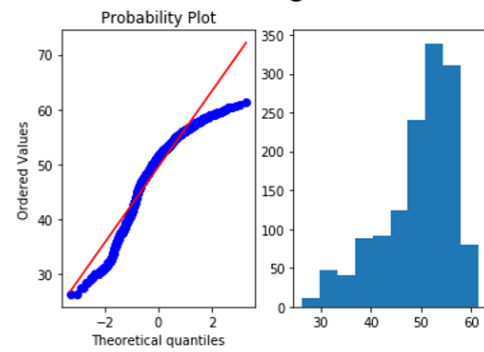

s. VD Peripapillary 8 Sectors

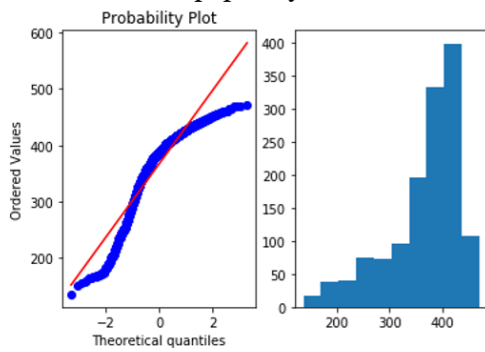

w. VD Inside Disc

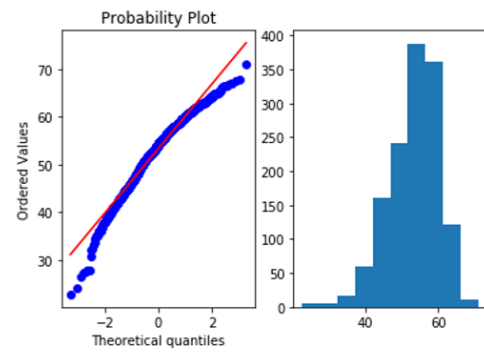

t. VD Superior Hemisphere

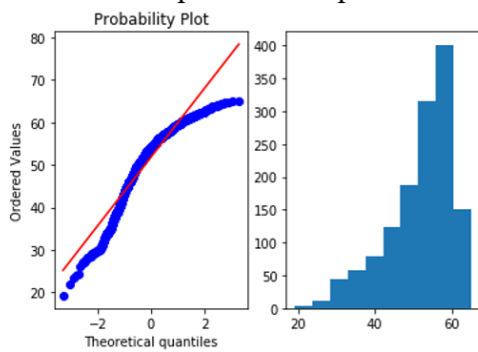

x. RNFL Thickness 8 Sectors

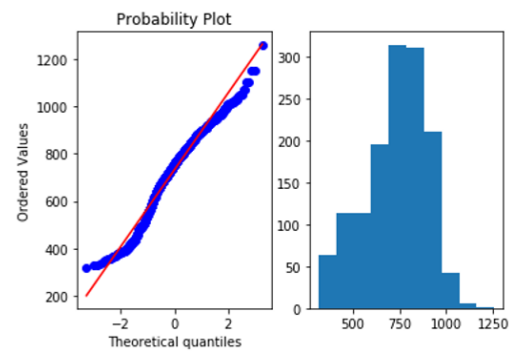

Figure S1-4

y. RNFL Thickness 4 Sectors

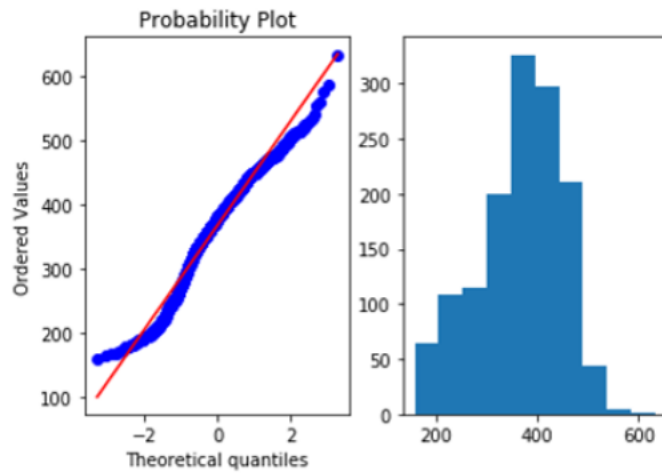

z. RNFL Superior Hemisphere

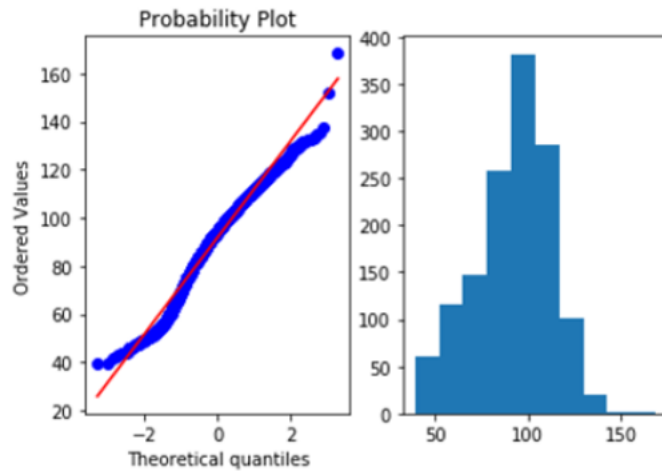

aa. RNFL Inferior Hemisphere

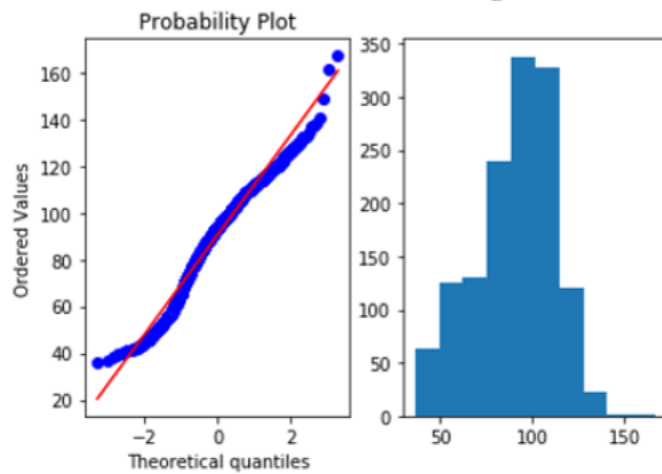

Figure S2

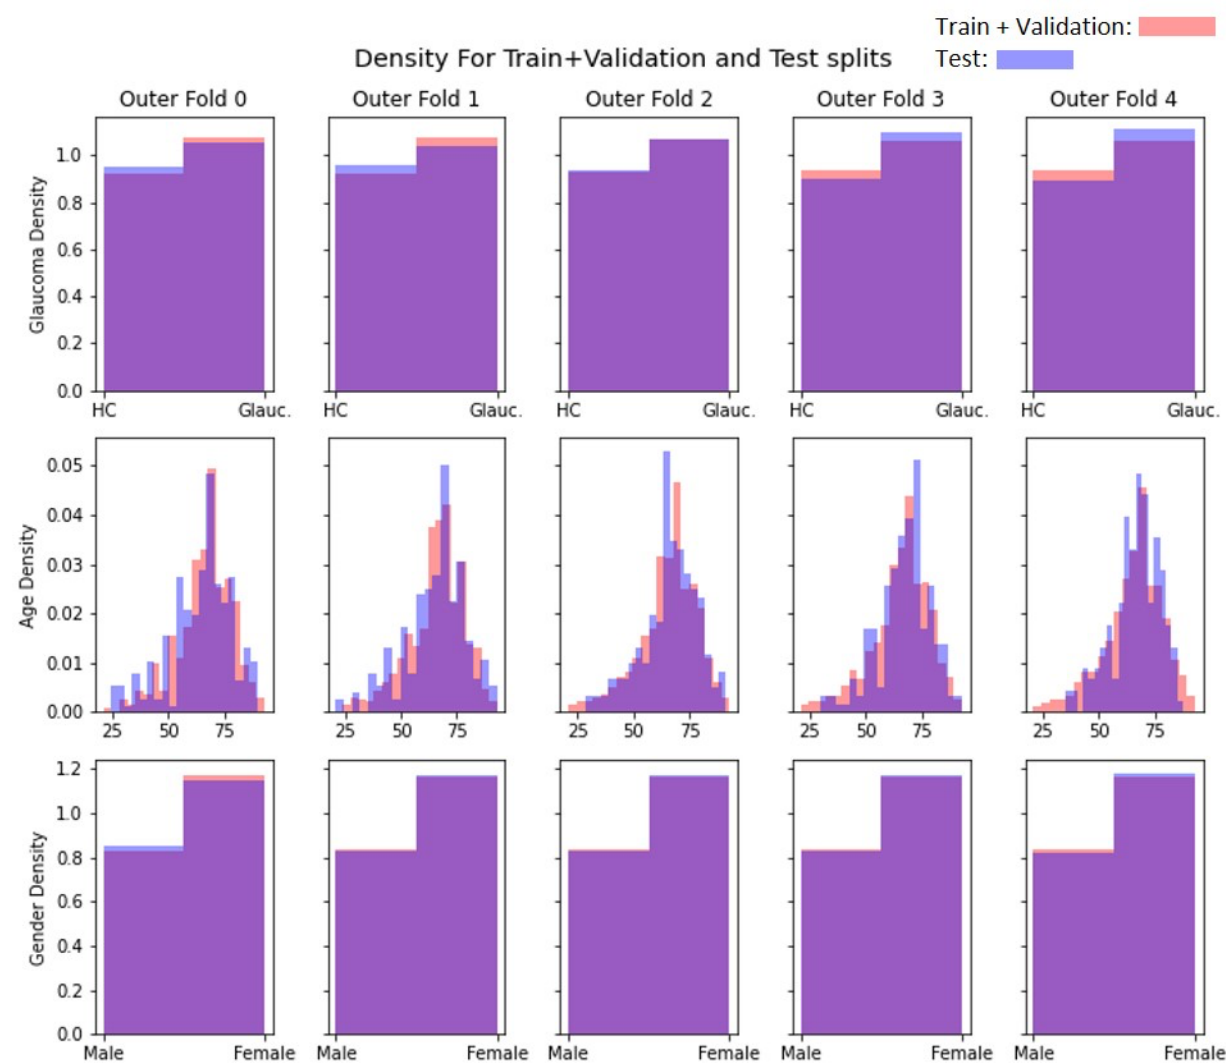

Figure S3

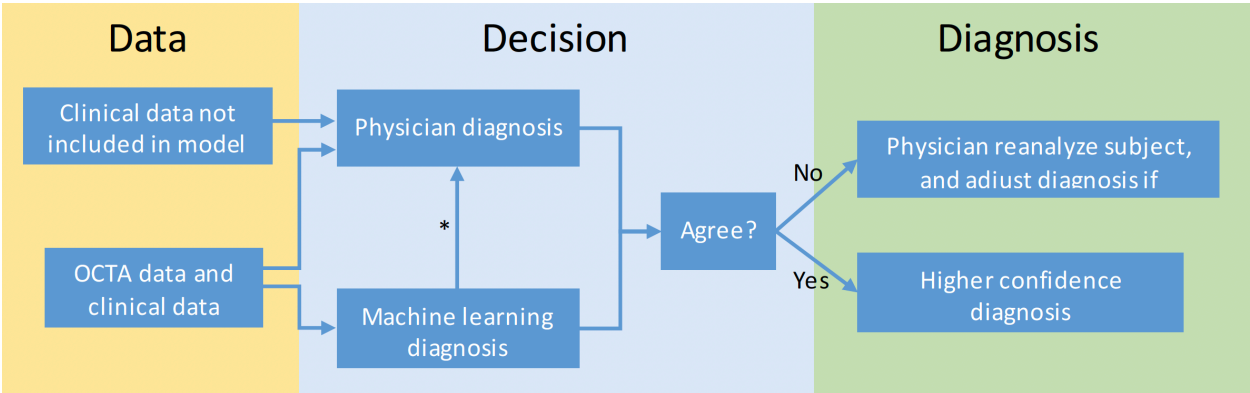

\*Additional knowledge gained by feature importance and decision trees

Figure S4

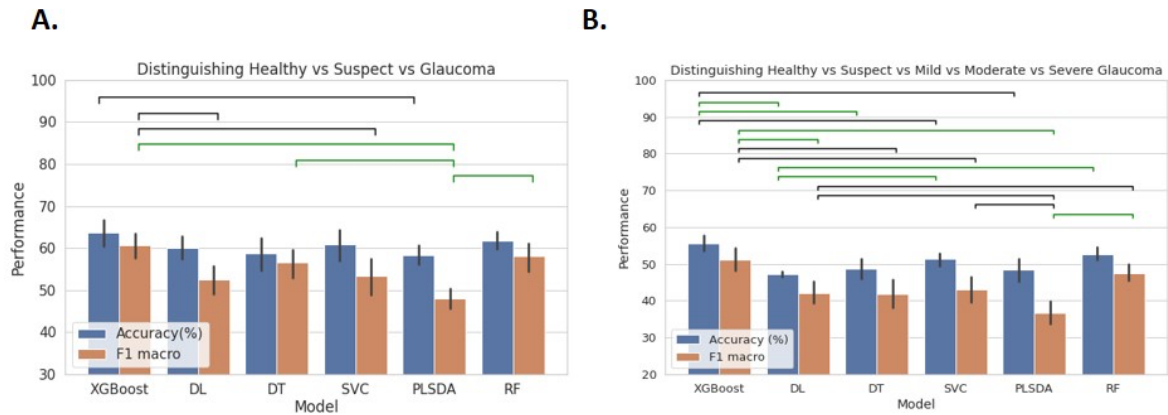

Figure S5

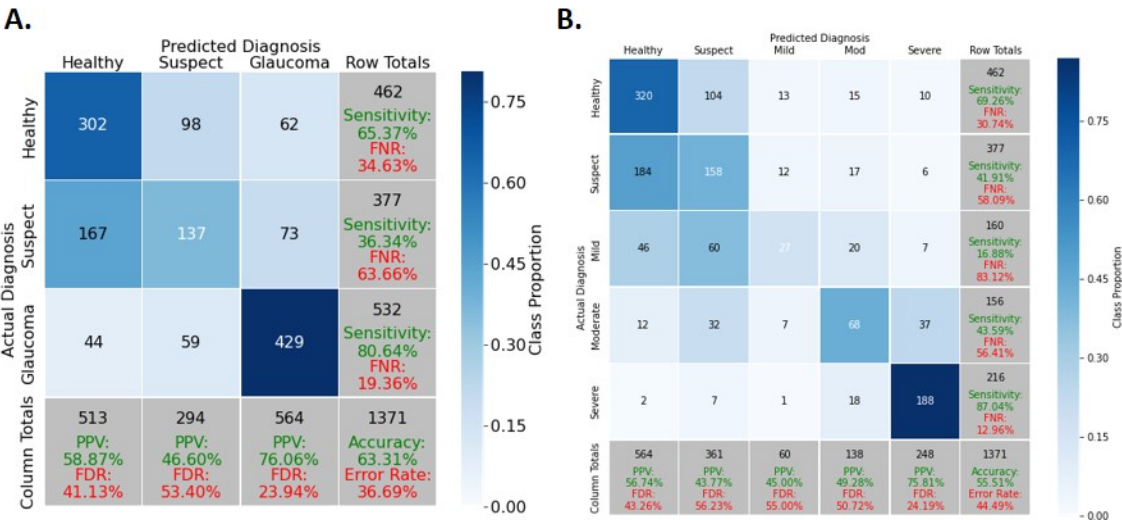

Supplementary Table 1: Definitions of disease history

|                            |                                                                                                  |
|----------------------------|--------------------------------------------------------------------------------------------------|
| History of Myopia          | Pre-correction refractive error <-0.5D                                                           |
| History of Hypertension    | Diagnosed in chart – systolic blood pressure > 130 mmHg and/or diastolic blood pressure >90 mmHg |
| History of Diabetes        | Diagnosed in chart – A1c > 6.4%                                                                  |
| Family History of Glaucoma | At least one immediate family member with clinically diagnosed glaucoma                          |

Supplementary Table 2: Comprehensive list of included demographic, clinical, and OCTA features

| <b>Demographic Features</b>                |                                    |
|--------------------------------------------|------------------------------------|
| Age                                        | Race                               |
| Sex                                        |                                    |
| <b>Clinical Features</b>                   |                                    |
| History of myopia                          | Family history of glaucoma         |
| History of hypertension                    | Central corneal thickness          |
| History of diabetes                        | Intraocular pressure               |
| <b>OCTA Features</b>                       |                                    |
| Foveal avascular zone (FAZ)                |                                    |
| FAZ area                                   | Flow density area density          |
| FAZ perimeter                              | Flow density length density        |
| Structural                                 |                                    |
| Cup area                                   | Vertical cup to disc ratio         |
| Cup volume                                 | Rim area                           |
| Cup to disc ratio                          | Rim volume                         |
| Horizontal cup to disc ratio               | Optic nerve head volume            |
| Optic nerve head vessel density            |                                    |
| Vessel density whole image                 | Inferior temporal vessel density   |
| Vessel density inside disc                 | Inferior nasal vessel density      |
| Vessel density peripapillary               | Nasal inferior vessel density      |
| Vessel density superior hemisphere         | Nasal superior vessel density      |
| Vessel density inferior hemisphere         | Superior nasal vessel density      |
| Temporal superior vessel density           | Superior temporal vessel density   |
| Temporal inferior vessel density           |                                    |
| Retina vessel density                      |                                    |
| Retinal vessel density superior            | Retinal vessel density temporal    |
| Retinal vessel density inferior            | Retinal vessel density nasal       |
| Retinal nerve fiber layer (RNFL) thickness |                                    |
| RNFL thickness nasal superior              | RNFL thickness peripapillary       |
| RNFL thickness superior nasal              | RNFL thickness superior hemisphere |
| RNFL thickness temporal inferior           | RNFL thickness inferior hemisphere |
| RNFL thickness inferior temporal           | Average retinal full thickness     |
| RNFL thickness inferior nasal              | Retina full thickness inferior     |
| RNFL thickness nasal inferior              | Retina full thickness superior     |
| RNFL thickness superior temporal           | Retinal full thickness temporal    |
| RNFL thickness temporal superior           | Retina full thickness nasal        |
| RNFL thickness superior                    | Retina inner thickness inferior    |
| RNFL thickness nasal                       | Retina inner thickness superior    |
| RNFL thickness inferior                    | Retina inner thickness temporal    |
| RNFL thickness temporal                    | Retina inner thickness nasal       |



Supplementary Table 3: Dimensions of the hyperparameter search spaces of each machine learning algorithm

|                                                            |                                                   |
|------------------------------------------------------------|---------------------------------------------------|
| <b>Support Vector Classifier (SVC)</b>                     |                                                   |
| L2 regularization weight                                   | $1/(2^N)$ where $-20 \leq N \leq 20$ , step 0.5   |
| Kernel                                                     | Linear or RBF                                     |
| Kernel coefficient                                         | $2^N$ where $-30 \leq N \leq 0$ , step 0.5        |
| <b>XGBoost</b>                                             |                                                   |
| Learning rate                                              | $10^{-N}$ where $1 \leq N \leq 10$                |
| Max depth                                                  | $1 \leq N \leq 20$                                |
| Booster                                                    | gbtree, gblinear, dart                            |
| Tree method                                                | auto, exact, approx, hist                         |
| Minimum loss required for leaf partition                   | $0.1 \leq N \leq 1$ , step 0.01                   |
| Minimum child weight                                       | $0 \leq N \leq 2$ , step 0.01                     |
| Maximum delta step                                         | $0 \leq N \leq 2$ , step 0.01                     |
| Subsample ratio                                            | $0 \leq N \leq 1$ , step 0.01                     |
| Alpha (L1 regularization weight)                           | $10^N$ where $-5 \leq N \leq 3$                   |
| Lambda (L2 regularization weight)                          | $10^N$ where $-5 \leq N \leq 3$                   |
| <b>Deep Feed Forward Neural Network (DL)</b>               |                                                   |
| Number of layers                                           | $1 \leq N \leq 9$                                 |
| Number of neurons per layer                                | $5 \leq N \leq 500$                               |
| Learning rate                                              | $10^{-N}$ where $1 \leq N \leq 10$                |
| Activation                                                 | PReLU or ReLU                                     |
| Inclusion of batch normalization                           | True or false                                     |
| Drop out rate per layer                                    | 0, 0.2 or 0.5                                     |
| <b>Random Forest (RF)</b>                                  |                                                   |
| Maximum depth                                              | $2 \leq N \leq 13$                                |
| Selection criterion                                        | gini or entropy                                   |
| Minimum samples per split                                  | 2, 5 or 10                                        |
| Minimum samples per leaf                                   | 1, 2, or 4                                        |
| Maximum features                                           | $10 \leq N \leq 64$                               |
| Number of estimators                                       | 10, 30, 50, 100, 200, 400, 600, 700, 1000 or 1200 |
| <b>Decision Tree (DT)</b>                                  |                                                   |
| Hyperparameter                                             | Value options                                     |
| Maximum depth                                              | $2 \leq N \leq 13$                                |
| Selection criterion                                        | gini or entropy                                   |
| Minimum samples per split                                  | 2, 5, or 10                                       |
| Minimum samples per leaf                                   | 1,2 or 4                                          |
| Maximum features                                           | $10 \leq N \leq 64$                               |
| <b>Partial Least-Squares Discriminant Analysis (PLDSA)</b> |                                                   |
| Number of components                                       | $1 \leq N \leq 50$                                |

Supplementary Table 4: Additional OCTA parameters compared across varying severities of glaucoma

| Variables<br>median<br>[Q1,Q3]         | Overall<br>(n=1371) | Normal<br>(n=462) | Suspect<br>(OHT) <sup>a</sup><br>(n=377) | Mild<br>(n=160) | Moderate<br>(n=156) | Severe<br>(n=216) | P-Value<br>(Bonferroni<br>adjusted) |
|----------------------------------------|---------------------|-------------------|------------------------------------------|-----------------|---------------------|-------------------|-------------------------------------|
| <b>RNFL<sup>b</sup></b>                |                     |                   |                                          |                 |                     |                   |                                     |
| <b>Thickness</b>                       | 379.2               | 421.0             | 399.5                                    | 365.0           | 314.4               | 235.6             | <0.001                              |
| <b>4 Sectors</b><br>(um)               | [319.2,427.1]       | [387.1,457.4]     | [368.1,435.8]                            | [340.8,394.2]   | [283.5,344.6]       | [203.1,263.3]     |                                     |
| <b>RNFL<sup>b</sup></b>                |                     |                   |                                          |                 |                     |                   |                                     |
| <b>Superior</b>                        | 94.5                | 105.6             | 99.5                                     | 91.8            | 80.3                | 59.3              | <0.001                              |
| <b>Hemisphere</b><br>(um)              | [79.5,106.3]        | [95.8,113.5]      | [91.2,108.1]                             | [84.5,97.6]     | [71.5,87.7]         | [51.5,67.6]       |                                     |
| <b>RNFL<sup>b</sup></b>                |                     |                   |                                          |                 |                     |                   |                                     |
| <b>Inferior</b>                        | 93.8                | 104.3             | 99.9                                     | 91.1            | 75.6                | 55.9              | <0.001                              |
| <b>Hemisphere</b><br>(um)              | [77.2,106.7]        | [94.7,113.5]      | [90.6,108.8]                             | [82.6,99.6]     | [66.5,85.3]         | [48.9,64.8]       |                                     |
| <b>Inner</b>                           |                     |                   |                                          |                 |                     |                   |                                     |
| <b>Thickness</b>                       | 101.4               | 107.0             | 103.4                                    | 101.1           | 92.9                | 72.6              | <0.001                              |
| <b>Macula</b><br>(um)                  | [90.5,109.4]        | [100.6,112.5]     | [97.5,111.5]                             | [94.9,106.7]    | [84.3,100.1]        | [63.7,82.9]       |                                     |
| <b>VD<sup>c</sup></b>                  |                     |                   |                                          |                 |                     |                   |                                     |
| <b>Superior</b>                        | 54.2                | 57.3              | 55.8                                     | 52.8            | 48.6                | 38.0              | <0.001                              |
| <b>Hemisphere</b><br>(%)               | [47.5,57.9]         | [54.3,60.2]       | [52.7,58.6]                              | [49.4,56.0]     | [44.8,51.9]         | [33.0,43.0]       |                                     |
| <b>VD<sup>c</sup></b>                  |                     |                   |                                          |                 |                     |                   |                                     |
| <b>Inferior</b>                        | 53.0                | 56.7              | 54.9                                     | 52.0            | 46.4                | 35.9              | <0.001                              |
| <b>Hemisphere</b><br>(%)               | [46.6,57.1]         | [53.2,59.0]       | [51.8,57.6]                              | [48.4,55.1]     | [41.6,50.0]         | [30.9,40.9]       |                                     |
| <b>VD<sup>c</sup></b>                  |                     |                   |                                          |                 |                     |                   |                                     |
| <b>Whole</b>                           | 51.3                | 54.5              | 52.7                                     | 50.4            | 46.2                | 37.8              | <0.001                              |
| <b>Image (%)</b>                       | [46.1,54.9]         | [51.6,56.7]       | [50.1,55.5]                              | [47.3,52.8]     | [41.8,48.5]         | [33.4,41.2]       |                                     |
| <b>Cup Area</b><br>(mm <sup>2</sup> )  | 1.2 [0.8,1.5]       | 1.1 [0.7,1.4]     | 1.1 [0.8,1.4]                            | 1.0 [0.7,1.4]   | 1.3 [0.9,1.6]       | 1.5 [1.3,1.9]     | <0.001                              |
| <b>Cup</b>                             |                     |                   |                                          |                 |                     |                   |                                     |
| <b>Volume</b><br>(mm <sup>3</sup> )    | 0.4 [0.2,0.6]       | 0.3 [0.1,0.5]     | 0.3 [0.2,0.5]                            | 0.3 [0.1,0.5]   | 0.4 [0.2,0.6]       | 0.5 [0.4,0.7]     | <0.001                              |
| <b>Rim</b>                             |                     |                   |                                          |                 |                     |                   |                                     |
| <b>Volume</b><br>(mm <sup>3</sup> )    | 0.1 [0.0,0.1]       | 0.1 [0.1,0.1]     | 0.1 [0.1,0.1]                            | 0.1 [0.1,0.1]   | 0.0 [0.0,0.1]       | 0.0 [0.0,0.0]     | <0.001                              |
| <b>Nerve</b>                           |                     |                   |                                          |                 |                     |                   |                                     |
| <b>Head</b>                            |                     |                   |                                          |                 |                     |                   |                                     |
| <b>Volume</b><br>(mm <sup>3</sup> )    | 0.2 [0.1,0.2]       | 0.2 [0.1,0.3]     | 0.2 [0.1,0.2]                            | 0.2 [0.1,0.2]   | 0.1 [0.1,0.1]       | 0.0 [0.0,0.1]     | <0.001                              |
| <b>Disc Area</b><br>(mm <sup>2</sup> ) | 2.2 [1.9,2.5]       | 2.2 [1.9,2.6]     | 2.3 [1.9,2.5]                            | 2.0 [1.8,2.4]   | 2.1 [1.7,2.4]       | 2.1 [1.8,2.4]     | <0.001                              |
| <b>FD<sup>d</sup> Area</b>             |                     |                   |                                          |                 |                     |                   |                                     |
| <b>Density</b><br>(%)                  | 48.0                | 49.0              | 49.1                                     | 47.7            | 46.7                | 44.1              | <0.001                              |
|                                        | [44.3,51.0]         | [46.0,51.7]       | [46.2,51.9]                              | [43.0,50.7]     | [42.6,49.1]         | [40.0,48.2]       |                                     |
| <b>FD<sup>d</sup></b>                  |                     |                   |                                          |                 |                     |                   |                                     |
| <b>Length</b>                          | 16.2                | 17.0              | 16.9                                     | 15.7            | 15.0                | 13.9              | <0.001                              |
| <b>Density</b><br>(%)                  | [13.5,17.7]         | [15.3,18.2]       | [14.4,18.0]                              | [12.6,17.7]     | [12.5,16.6]         | [11.1,16.0]       |                                     |

**FAZ<sup>e</sup>**

|                  |               |               |               |               |               |               |       |
|------------------|---------------|---------------|---------------|---------------|---------------|---------------|-------|
| <b>Perimeter</b> | 2.2 [1.9,2.6] | 2.2 [1.8,2.5] | 2.3 [2.0,2.6] | 2.2 [1.9,2.5] | 2.2 [1.8,2.6] | 2.3 [2.0,2.7] | 0.005 |
| <b>(mm)</b>      |               |               |               |               |               |               |       |

Abbreviations: <sup>a</sup> OHT: ocular hypertension, <sup>b</sup> RNFL: retinal nerve fiber layer, <sup>c</sup> VD: vessel density, <sup>d</sup> FD: flow density, <sup>e</sup> FAZ: foveal avascular zone
